# Supplementary material for: Highly sensitive and label-free determination of thiram residue using surface-enhanced Raman spectroscopy (SERS) coupled with paper-based microfluidics
Source: Royal Society of Chemistry journal article supplement (doi:10.1039/c7ay01637a), 2017-01-01
Supplement: c7ay01637a1.pdf [file c7ay01637a1.pdf]

1 Supporting Information

2

3 **Highly sensitive and label-free determination of thiram**  
4 **residue using surface-enhanced Raman spectroscopy (SERS)**  
5 **coupled with paper-based microfluidics**

6 Jiaji Zhu,<sup>ab</sup> Quanshen Chen,<sup>\*a</sup> Felix Y.H. Kutsanedzie,<sup>a</sup> Mingxiu Yang,<sup>a</sup>

7 Qin Ouyang,<sup>a</sup> Hui Jiang<sup>c</sup>

8 *<sup>a</sup>School of Food and Biological Engineering, Jiangsu University, Zhenjiang 212013, P.R.*  
9 *China. E-mail: q.s.chen@hotmail.com; Fax: +86-511-88780201; Tel: +86-511-88790318*

10 *<sup>b</sup>School of Electrical Engineering, Yancheng Institute of Technology, Yancheng 224051,*  
11 *P.R.China*

12 *<sup>c</sup>School of Electrical & Information Engineering, Jiangsu University, Zhenjiang 212013, P.R.*  
13 *China.*

## 15 **1. Synthesis of Au@Ag NPs**

16 According to previous report,<sup>1</sup> first, 0.25 ml of 0.1 M HAuCl<sub>4</sub> was added into 100ml  
17 of ultrapure water and then heated to boiling under magnetic stirring. After quickly  
18 injecting 1.5 ml of 1% sodium citrate, the mixed solution was refluxed for ~30 min  
19 until it became wine red. After gradually cooling to room temperature under stirring,  
20 the resulting solution was filtered through 0.22 μm Millipore membrane, and the Au  
21 NPs colloid with the size of 30 nm was stored in a refrigerator at 4 °C for further use.  
22 Second, 10 ml of above Au NPs colloid and 1.5 ml of 0.1 M ascorbic acid were mixed  
23 in a round flask under magnetic stirring. Then 3.5 ml of 1mM AgNO<sub>3</sub> was dropwise  
24 added into the above mixture at a rate of one drop per 30 s. Silver nitrate was reduced  
25 by ascorbic acid and the resultant silver continuously grew at the surface of Au seeds.  
26 After the wine red of solution changed into orange yellow, the solution was stirred for  
27 30 min and the Au@Ag NPs were obtained.

## 28 **2. Reproducibility and stability evaluation of Au@Ag NPs**

29 The SERS enhancement factor depends on size, shape, aggregation and spatial  
30 distribution of the metallic nanoparticles. In order to demonstrate the reproducibility  
31 and stability of Au@Ag NPs, we have synthesized another batch Au@Ag NPs  
32 according to the same method. The characterizations of Au@Ag NPs is shown in  
33 Fig.S1. The SEM observation was performed (Fig.S1A) to show the highly uniform  
34 nanoparticles, the core-shell structure of Au@Ag NPs with 30 nm Au core and 7nm  
35 Ag shell is clearly shown by the TEM image in Fig. S1B, and the extinction-visible  
36 spectrum of Au@Ag NPs is shown in Fig. S1C.

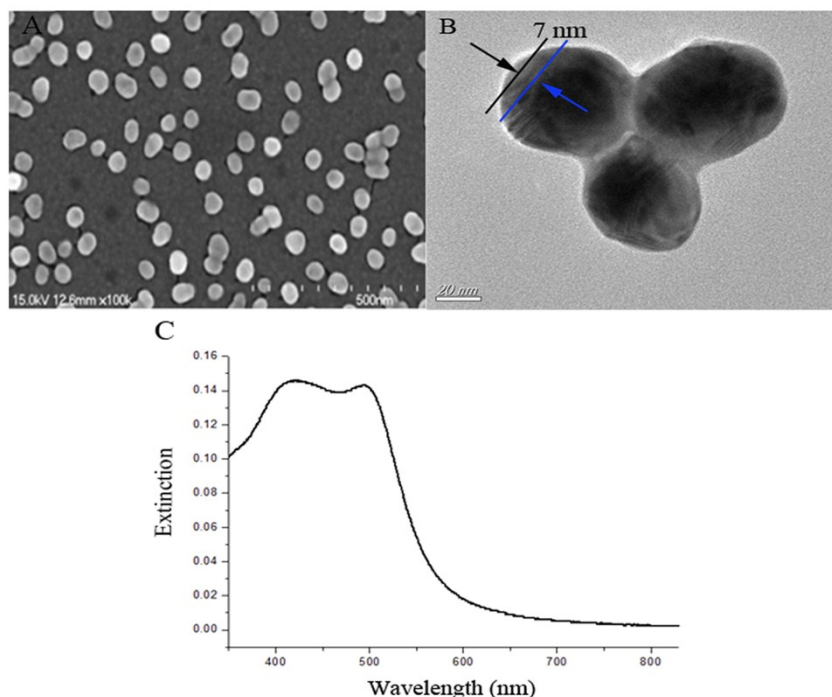

37

38 Fig. S1 (A) SEM image of Au@Ag NPs. (B) The TEM image of Au@Ag NPs with  
 39 30 nm Au core and 7 nm Ag shell. (C) Extinction visible spectrum of Au@Ag NPs.

40 Fig. S2 shows the representative SERS spectra of thiram solution at various  
 41 concentrations from  $1.0 \times 10^{-4}$  to  $5.0 \times 10^{-10}$  mol /L which were measured under the  
 42 optimal conditions. Each spectrum represents the average of measurements at random  
 43 4 spots. The LOD was found to be  $1.0 \times 10^{-9}$  mol/L. Fig.S3 shows the SERS spectra of  
 44 thiram at the concentration of  $1.0 \times 10^{-5}$  mol/L from 5 different spots. The relative  
 45 standard deviation (RSD) results of Raman peaks at 564, 1143 and 1379  $\text{cm}^{-1}$  are  
 46 8.9%, 6.7% and 8.4%. Fig.S4 shows the SERS spectra of thiram at the concentration  
 47 of  $1.0 \times 10^{-6}$  mol/L from 5 different spots. The relative standard deviation (RSD)  
 48 results of Raman peaks at 564, 1143 and 1379  $\text{cm}^{-1}$  are 3.9%, 3.1% and 3.9%. These  
 49 results demonstrated Au@Ag NPs has highly reproducibility and stability.

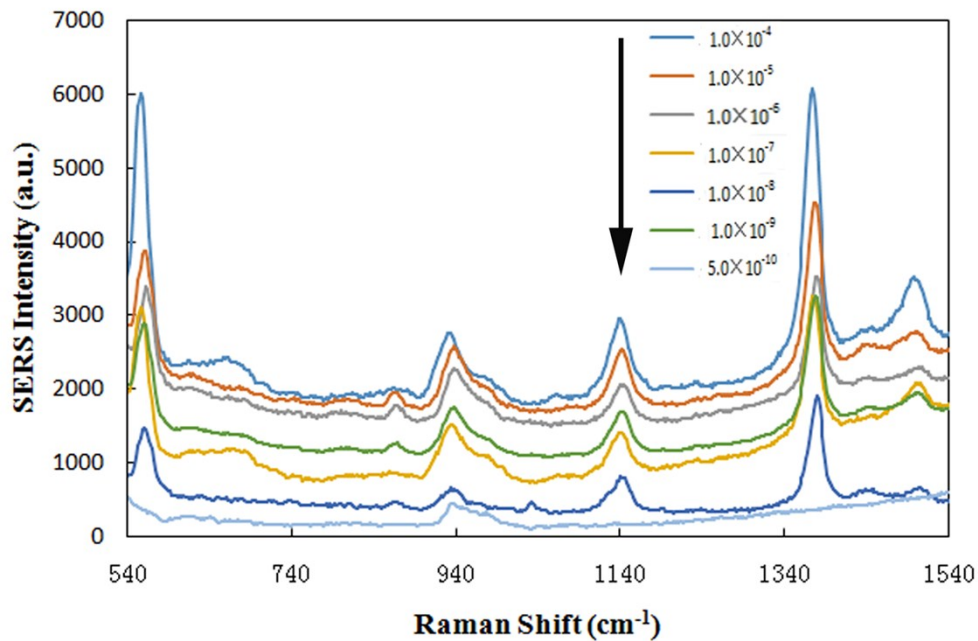

50

51 Fig. S2 The SERS spectra of thiram solution with the concentration decreased from

52  $1.0 \times 10^{-4}$  mol/L to  $5.0 \times 10^{-10}$  mol/L.

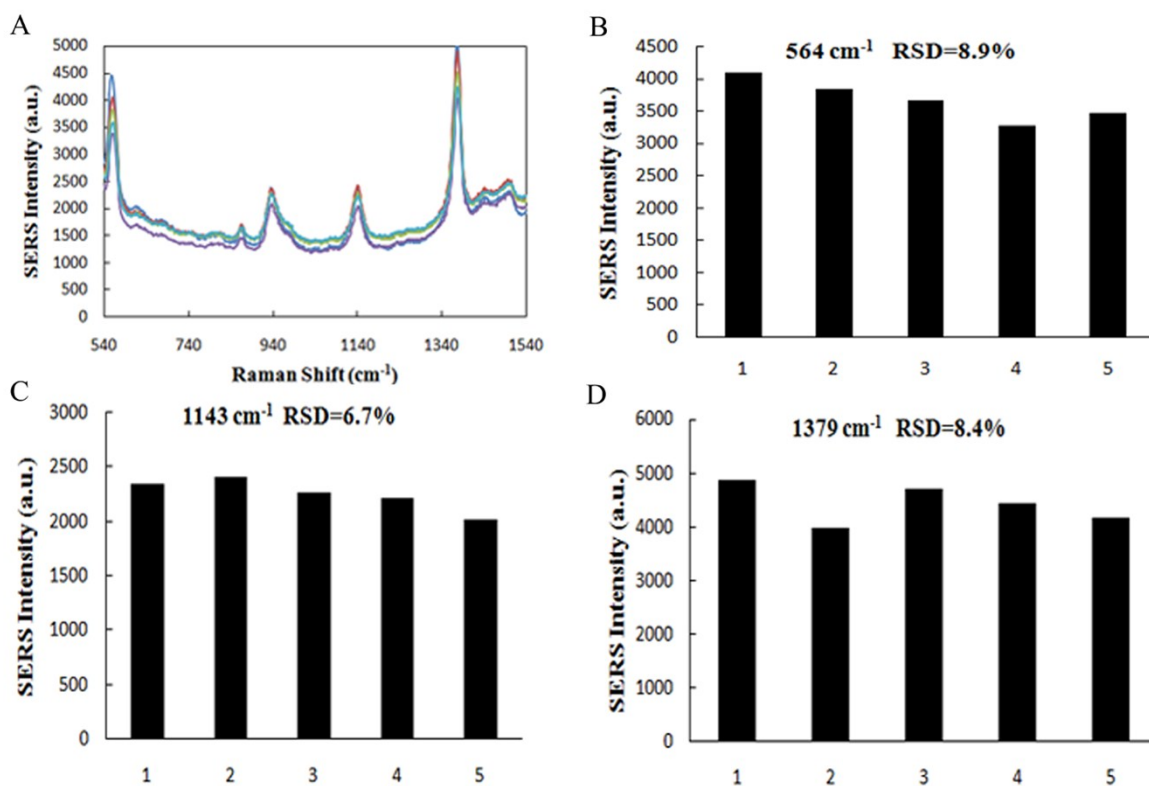

53

54 Fig.S3 (A) The SERS spectra of thiram solution ( $1.0 \times 10^{-5}$  mol/L) at 5 different spots.

55 The peak intensities and RSD results at (B)  $564 \text{ cm}^{-1}$ . (C)  $1143 \text{ cm}^{-1}$ . (D)  $1379 \text{ cm}^{-1}$ .

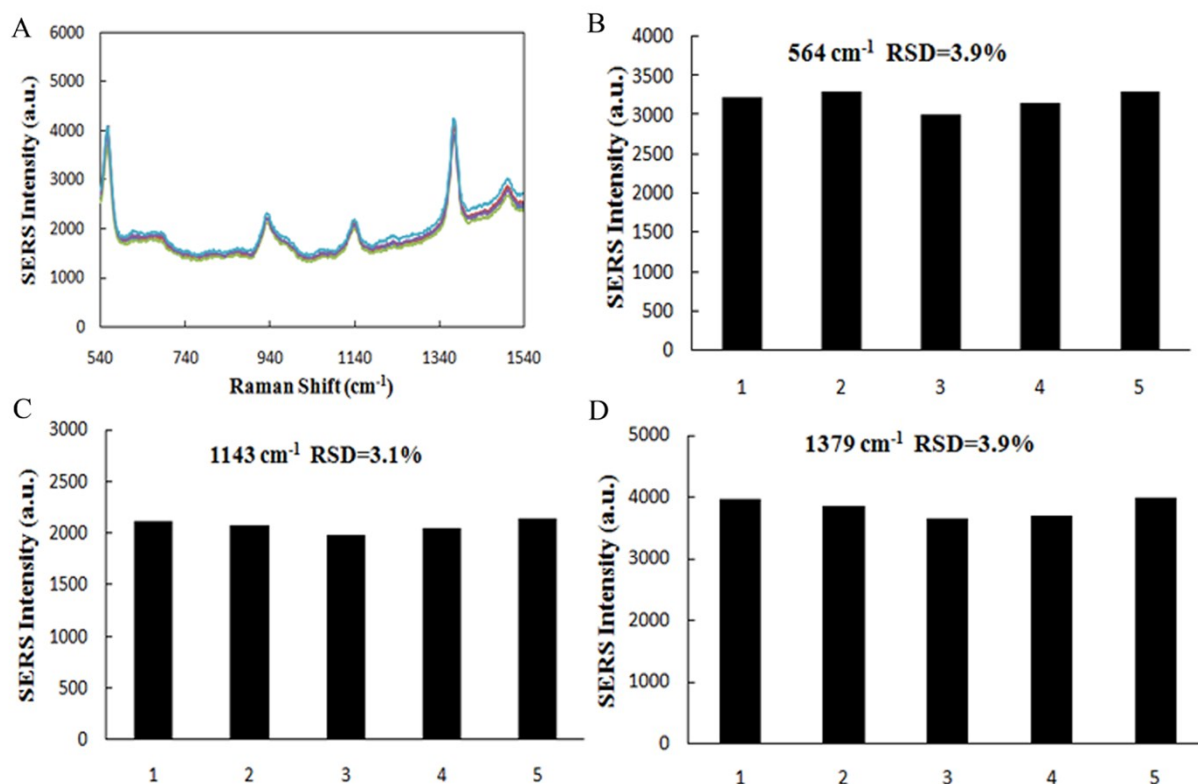

56

57 Fig.S4 (A) The SERS spectra of thiram solution (1.0×10<sup>-6</sup> mol/L) at 5 different spots.

58 The peak intensities and RSD results at (B) 564cm<sup>-1</sup>. (C) 1143cm<sup>-1</sup>. (D) 1379cm<sup>-1</sup>.

### 59 3. Real sample pretreatment

60 Pretreatment of tea according to previous reports.<sup>2</sup> In this work, tea samples were  
 61 purchased from local market and dried in a vacuum oven at 35 °C until constant  
 62 weight. First, samples of green tea (5 g) were mixed with 30 mL acetonitrile (C<sub>2</sub>H<sub>3</sub>N)  
 63 in a 50 mL centrifuge tube and sonically extracted for 5 min, then centrifugation for 5  
 64 min at 4500 rpm. The extraction procedure was repeated for three times and the  
 65 extract were combined. Subsequently, filter column for the removal of pigment was  
 66 prepared, 0.8 gram Fe<sub>3</sub>O<sub>4</sub> nanoparticles (100 nm in diameter) mixed uniformly with  
 67 0.3 gram graphitized carbon in a 10 mL centrifuge tube. Then, various concentrations  
 68 of thiram were added in to the extract after which was filtered by filter column.

69 Finally, we obtained gradient concentration solution ( $1.0 \times 10^{-4}$  mol/L,  $1.0 \times 10^{-5}$  mol/L,  
70  $1.0 \times 10^{-6}$  mol/L,  $1.0 \times 10^{-7}$  mol/L,  $1.0 \times 10^{-8}$  mol/L,  $1.0 \times 10^{-9}$  mol/L) for measurement.  
71 Fig.S5 shows the spectra of the tea, with and without thiram.

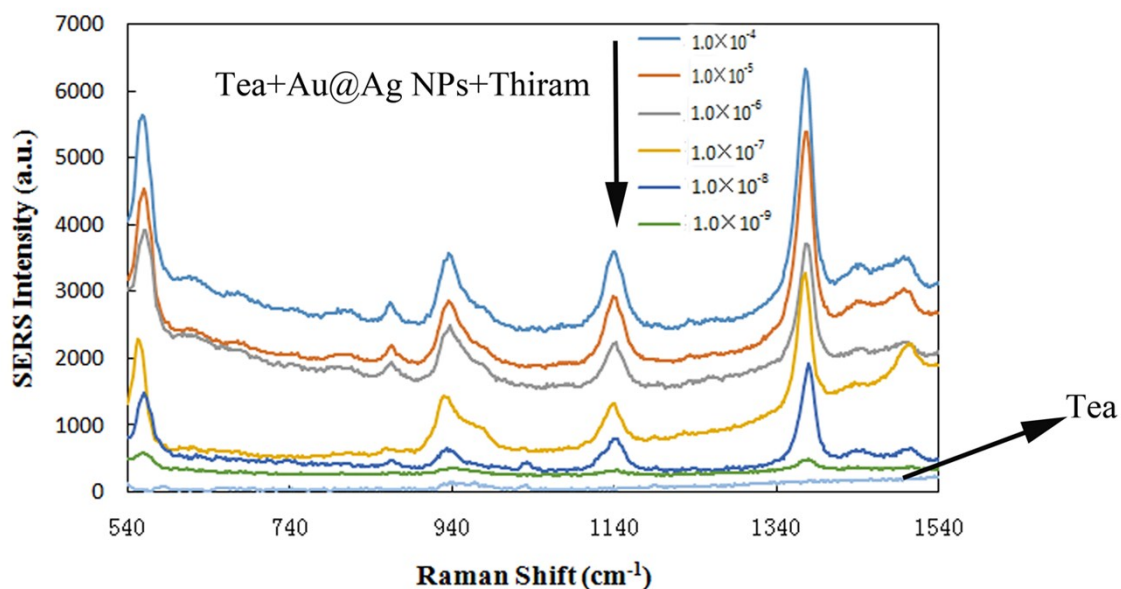

72  
73

Fig. S5 The spectra of the tea, with and without thiram.

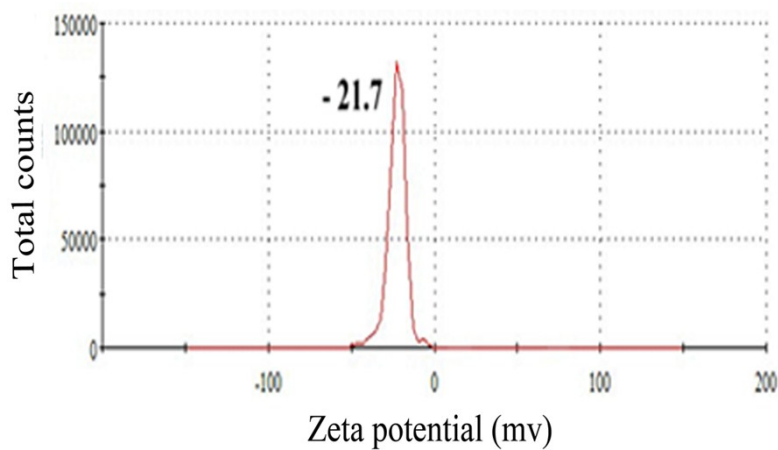

74  
75

Fig. S6 The zeta potential value of Au@Ag NPs.

## 76 References

77 1 Olson T. Y., Schwartzberg A.M., Orme C.A., Talley C.E., O'Connell B., Zhang J.Z.  
78 J.Phys.Chem.C 2008, 112, 6319-6329.

79 2 Ruyan H., Weiting J., Xiaosan Q., Xiaohui W., Yu X., Xiaochun W., J. Agric &  
80 Food. Chem. 2013, 61(51), 12565–12571.
